# Supplementary material for: 3-pyridyl inhibitors with novel activity against Trypanosoma cruzi reveal in vitro profiles can aid prediction of putative cytochrome P450 inhibition
Source: PubMed Central journal article supplement (PMC5861127; doi:10.1038/s41598-018-22043-z), 2018-03-20

**3-pyridyl inhibitors with novel activity against *Trypanosoma cruzi* reveal *in vitro* profiles can aid prediction of putative cytochrome P450 inhibition**

**Melissa L. Sykes<sup>1\*</sup> and Vicky M. Avery<sup>2</sup>**

1. Discovery Biology, Griffith Institute for Drug Discovery, Griffith University, Nathan, Queensland, Australia. Correspondence to [m.sykes@griffith.edu.au](mailto:m.sykes@griffith.edu.au)

2. Discovery Biology, Griffith Institute for Drug Discovery, Griffith University, Nathan, Queensland, Australia.

**Supplementary Figure 1.** The criteria used to identify the  $E_{\max}$  value of compounds. The  $E_{\max}$  for each compound is at least two points in from the beginning of the plateau of activity (circled). The example compound in this graph is the reference drug, nifurtimox.

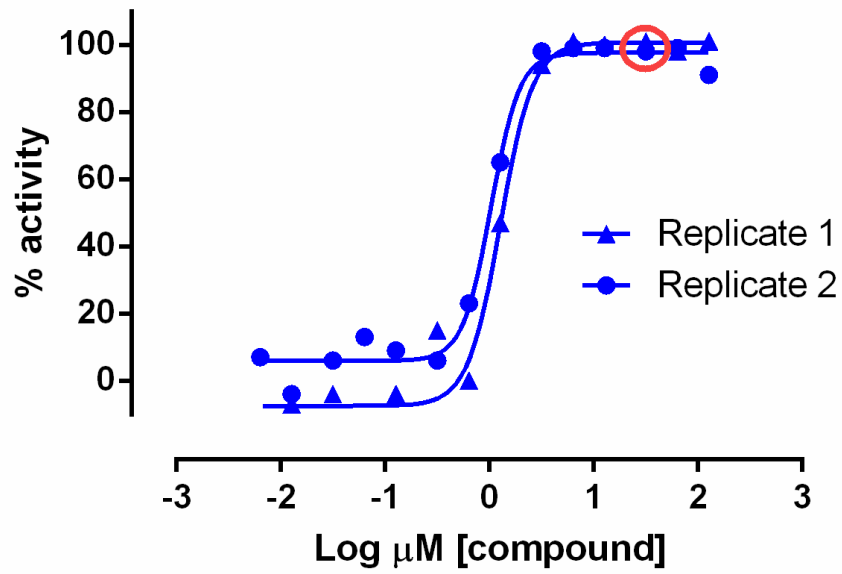

Supplement: 41598_2018_22043_MOESM1_ESM.pdf [file 41598_2018_22043_MOESM1_ESM.pdf]
